# Supplementary material for: Iron and nitrogen-co-doped carbon quantum dots for the sensitive and selective detection of hematin and ferric ions and cell imaging
Source: Royal Society of Chemistry journal article supplement (doi:10.1039/d1an00828e), 2021-01-01
Supplement: d1an00828e1.pdf [file d1an00828e1.pdf]

## Supplementary Material

### Iron and nitrogen co-doped carbon quantum dots for sensitive and selective detection of hematin and ferric ions and cell imaging

Yuqing Wu <sup>a,1</sup>, Lei Cao <sup>a,b,1</sup>, Minghui Zan <sup>c</sup>, Zheng Hou <sup>a</sup>, Mingfeng Ge <sup>a</sup>, Wen-Fei Dong <sup>a</sup>, Li Li <sup>a,\*</sup>

<sup>a</sup> CAS Key Laboratory of Biomedical Diagnostics, Suzhou Institute of Biomedical Engineering and Technology, Chinese Academy of Science (CAS), Suzhou 215163, P. R. China;

<sup>b</sup> School of Biomedical Engineering (Suzhou), Division of Life Sciences and Medicine, University of Science and Technology of China, Hefei 230026, P. R. China;

<sup>c</sup> State Key Laboratory of Pathogen and Biosecurity, Beijing Institute of Microbiology and Epidemiology, Beijing, 100071, P. R. China;

□ Corresponding authors.

E-mail addresses: lil@sibet.ac.cn (L. Li)

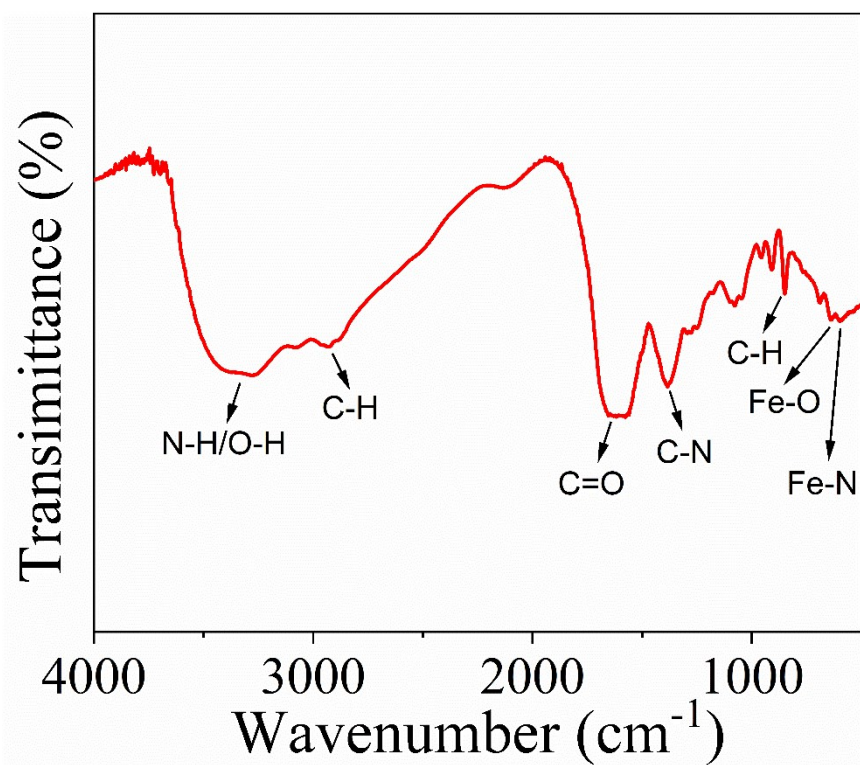

**Fig. S1.** FTIR spectrum of Fe, N-CDs.

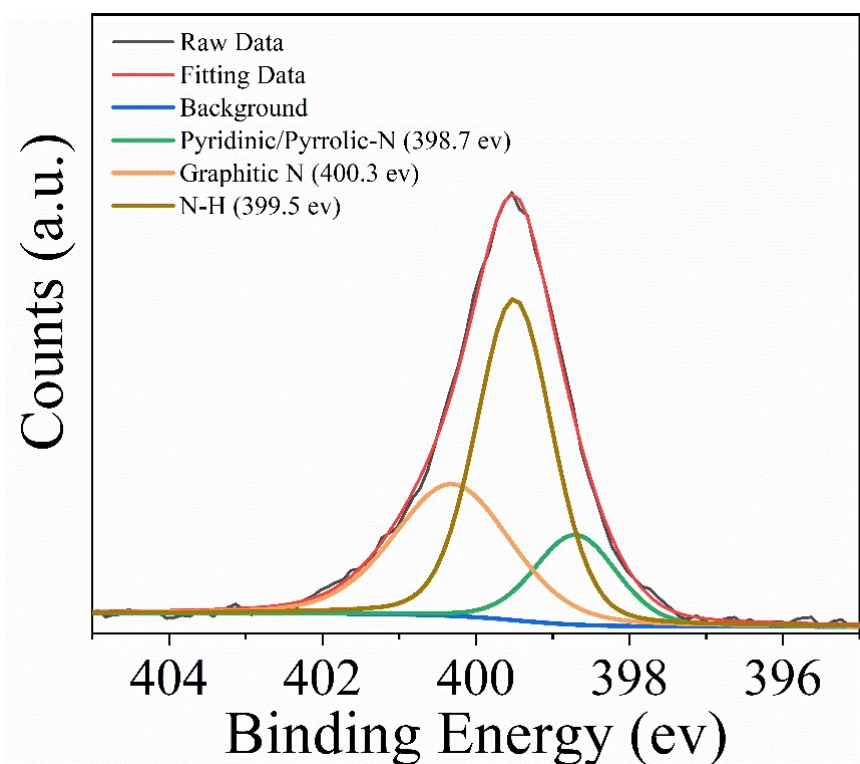

**Fig. S2.** N 1s XPS spectrum of Fe, N-CDs.

**Fig. S3.** Effect of ionic strengths on the fluorescence intensity of the Fe, N-CDs with the excitation wavelength at 365 nm.

**Fig. S4.** Effect of different pH values on the fluorescence intensity of the Fe, N-CDs.

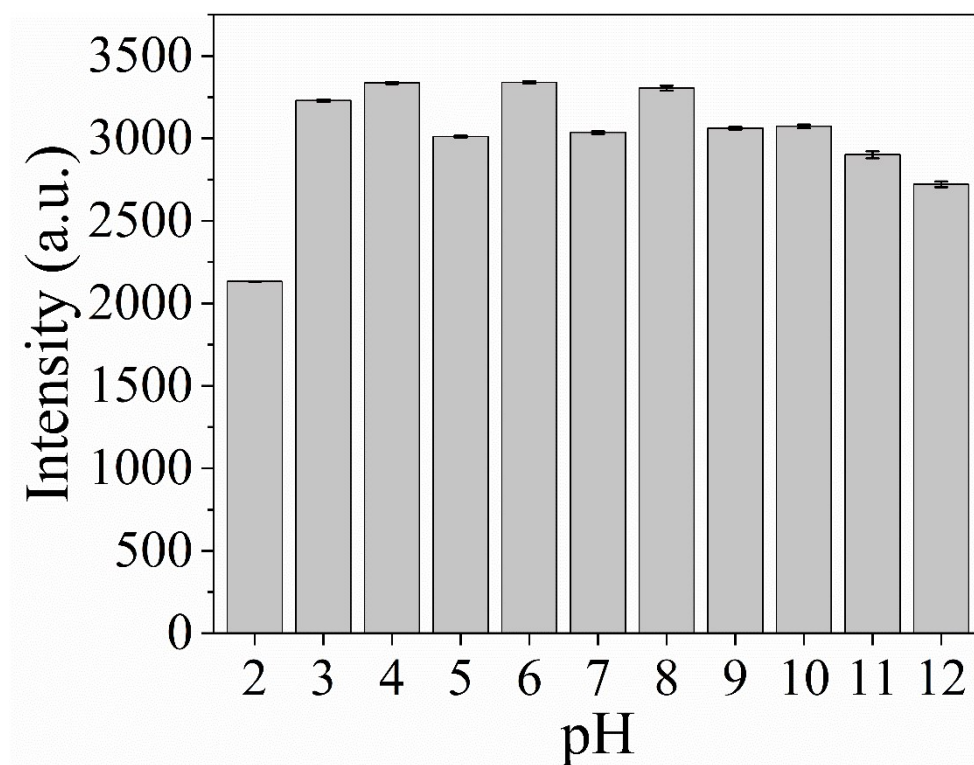

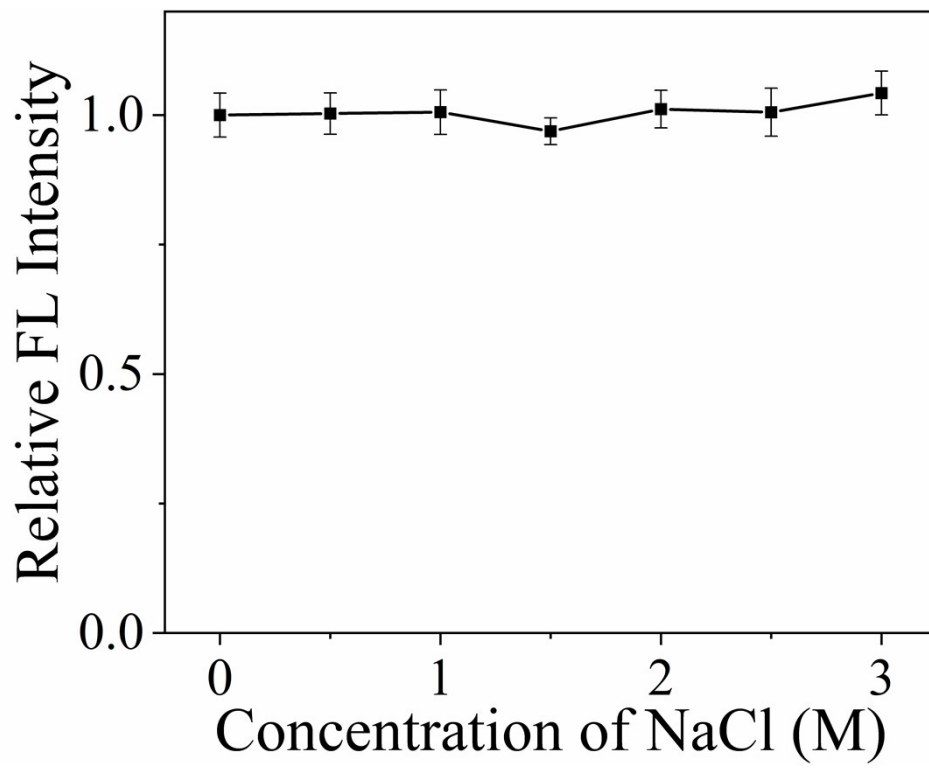

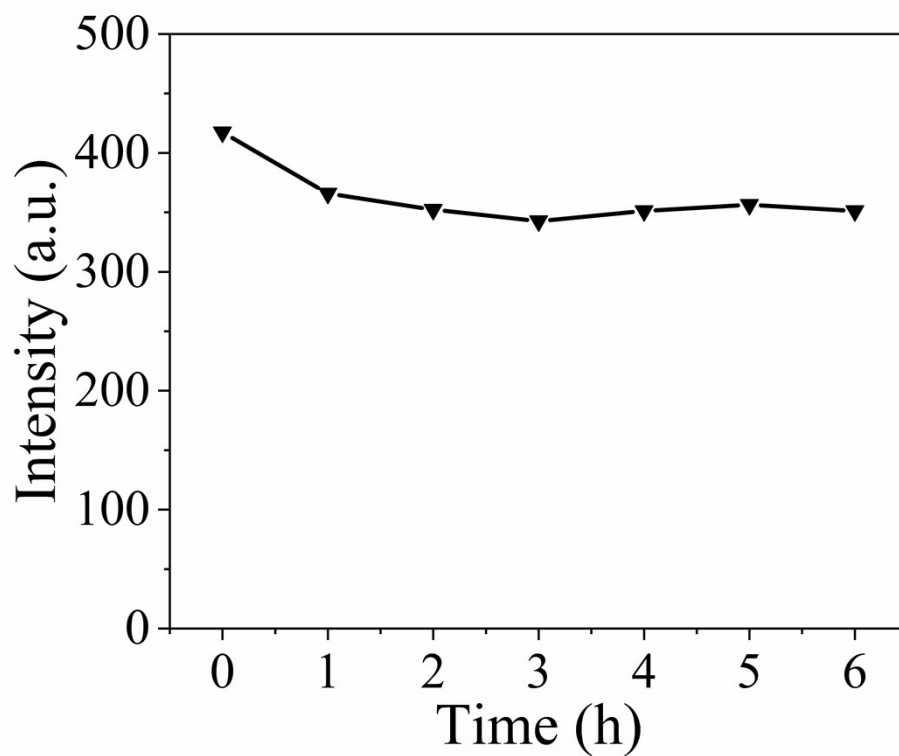

**Fig. S5.** Fluorescence intensity of Fe, N-CDs under irradiation of 365 nm UV light.

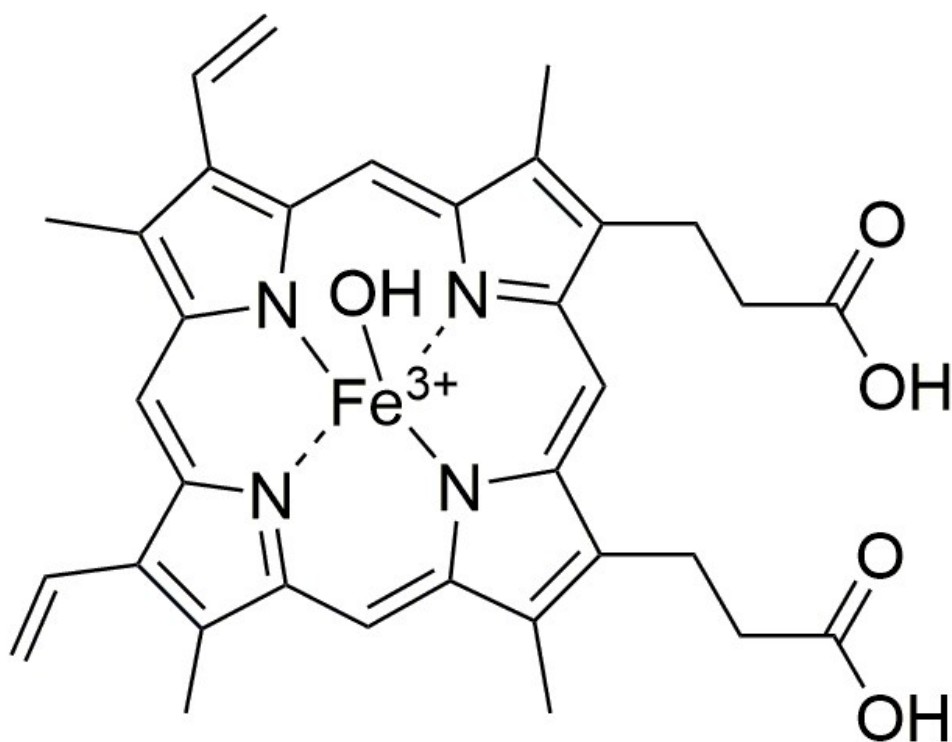

**Fig. S6.** The structure formula of hematin.

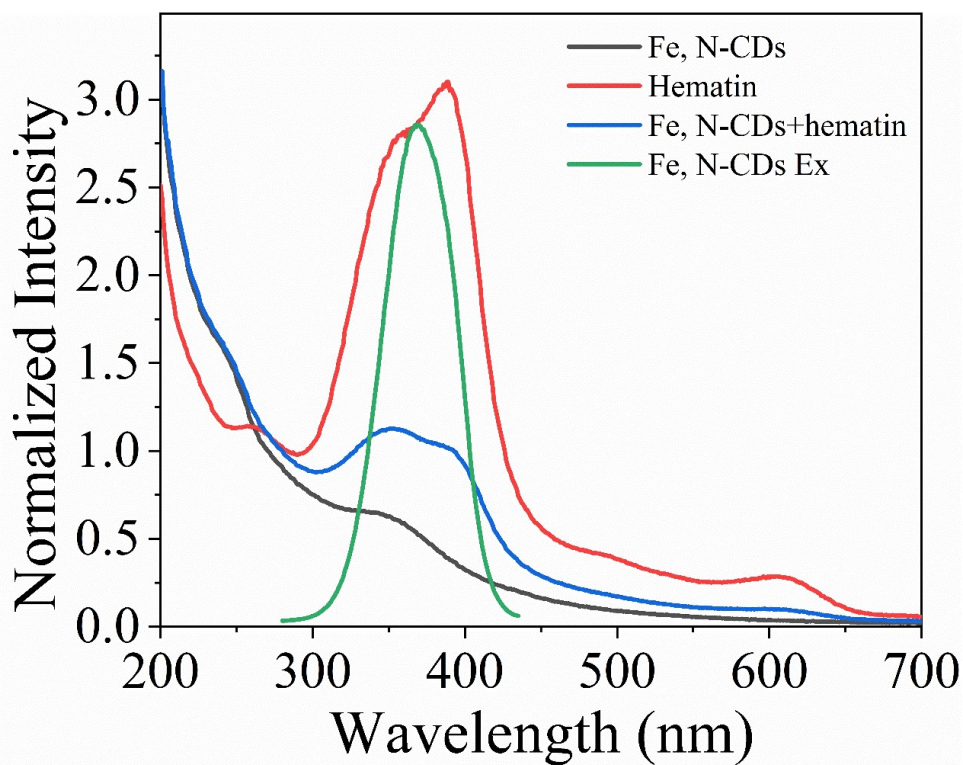

**Fig. S7.** UV-vis absorption of Fe, N-CDs in the absence and presence of hematin.

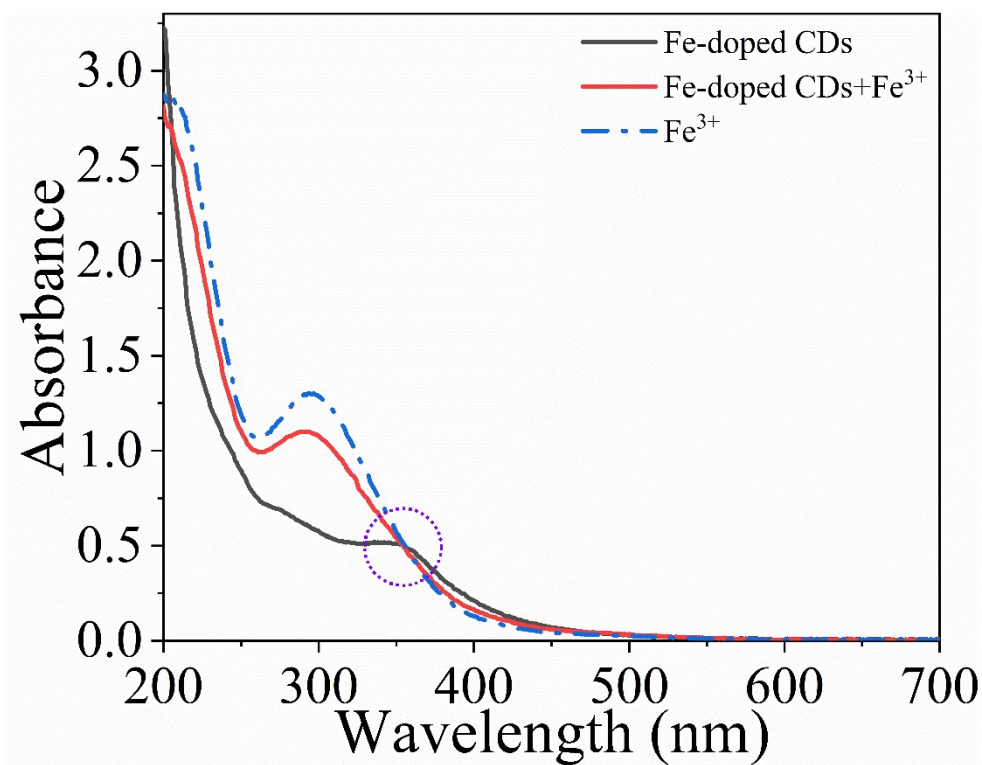

**Fig. S8.** UV-vis absorption of Fe, N-CDs in the absence and presence of Fe<sup>3+</sup>.

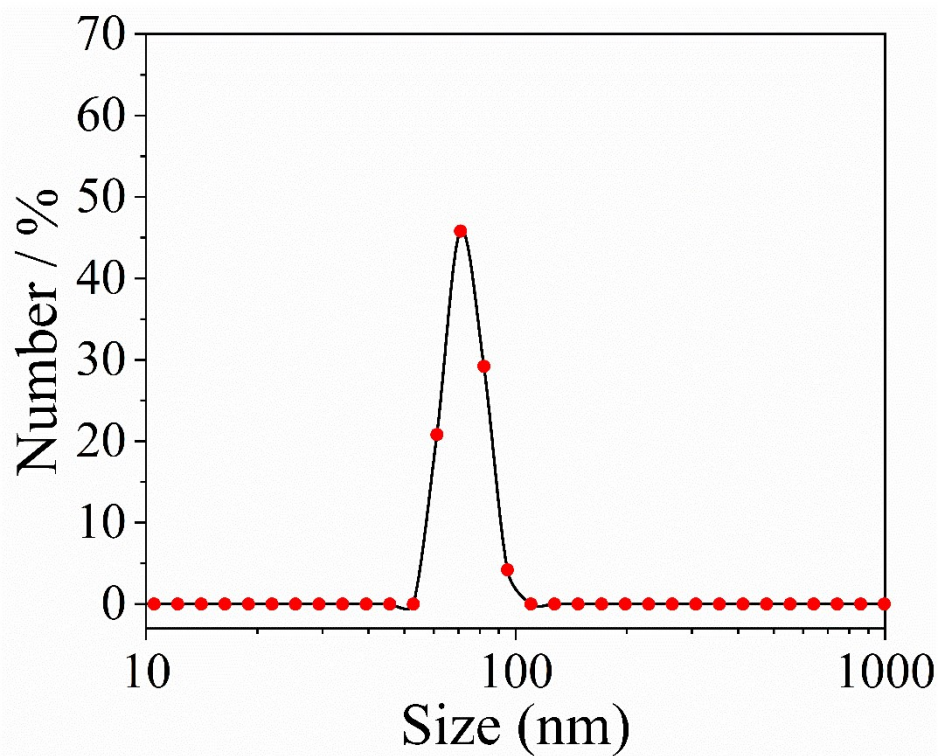

**Fig. S9.** Number-average particle diameter from dynamic light scattering of Fe, N-CDs with  $\text{Fe}^{3+}$  which dispersed in ultrapure water.

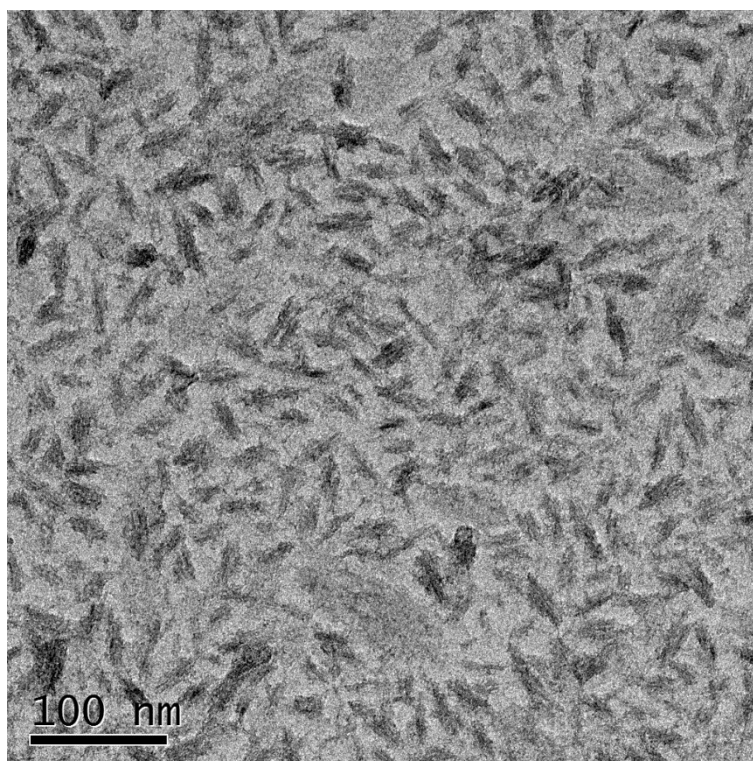

**Fig. S10.** The TEM image of Fe, N-CDs after adding  $\text{Fe}^{3+}$ .

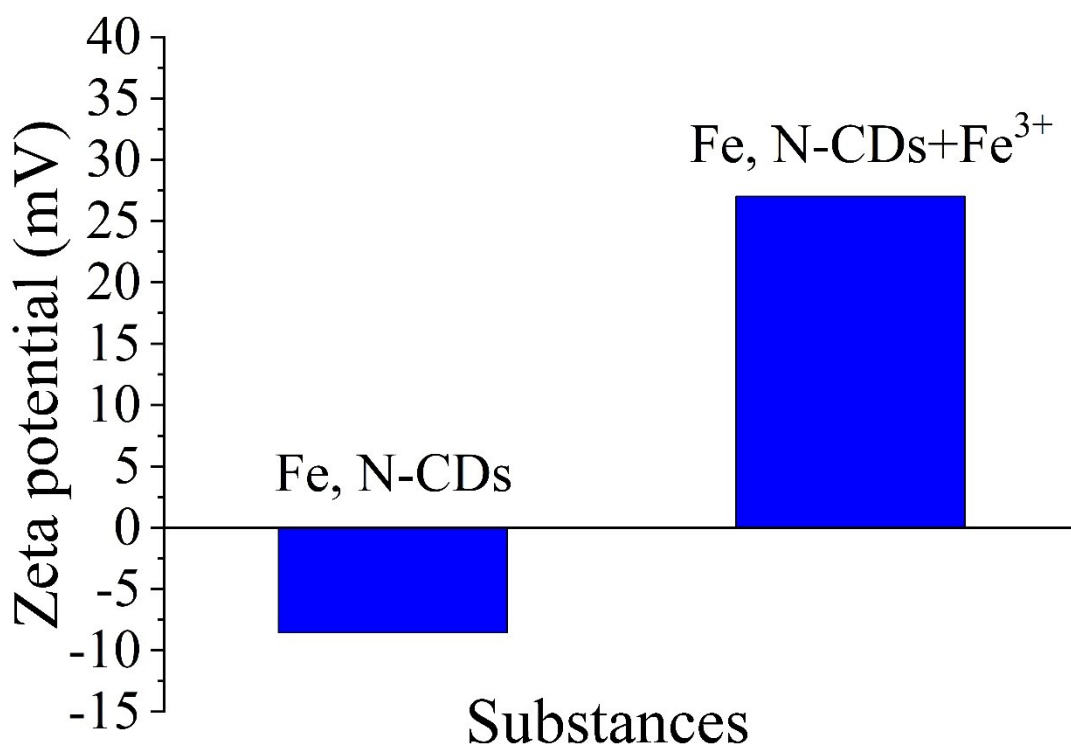

**Fig. S11.** The zeta potential of Fe, N-CDs before and after Fe<sup>3+</sup> addition.

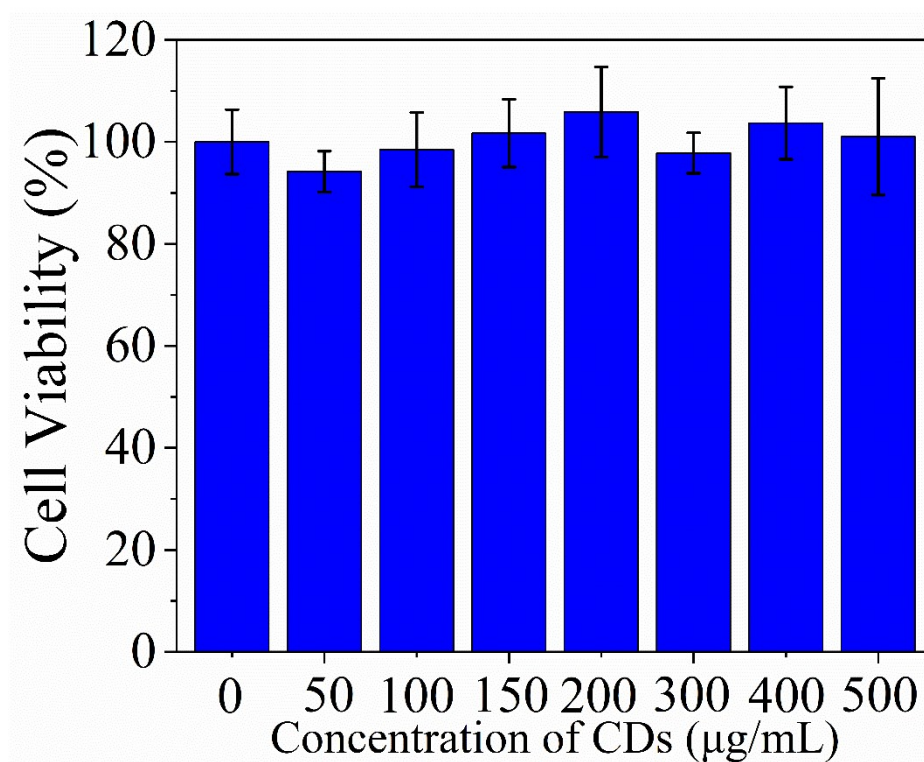

**Fig. S12.** Cytotoxicity of the Fe, N-CDs against HeLa cells.



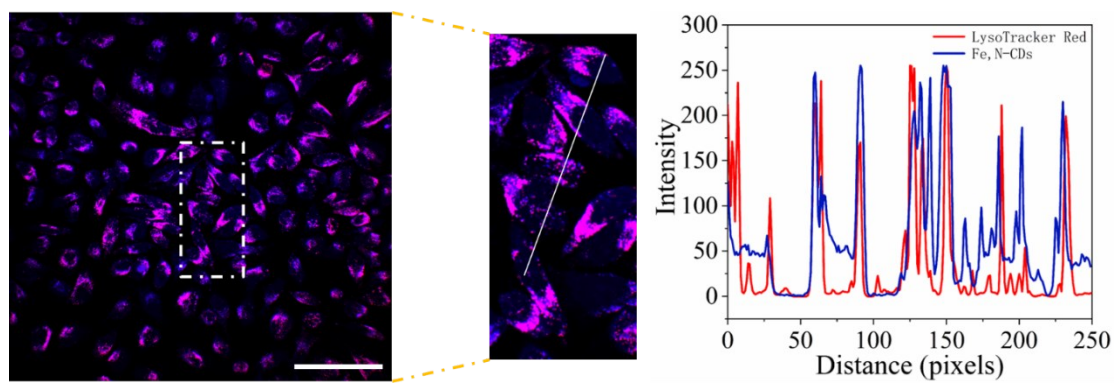

**Fig. S13.** The results of fluorescent colocalization analysis. The scale bar is 100  $\mu\text{m}$ .

**Table S1.** Comparison of other reported nanoparticles for the determination of hematin.

| Method    | Linear range ( $\mu\text{mol/L}$ ) | Detection limit ( $\mu\text{mol/L}$ ) | Ref.      |
|-----------|------------------------------------|---------------------------------------|-----------|
| N-CDs     | 0.4~32                             | 0.18                                  | S1        |
| CQDs      | 0.5~30                             | 0.10                                  | S2        |
| QDs       | 0.5~15                             | 0.32                                  | S3        |
| CQDs      | 0.5~10                             | 0.25                                  | S4        |
| N, Cl-CDs | 1.53-80                            | 0.46                                  | S5        |
| Fe, N-CDs | 0~27                               | 0.024                                 | This work |

**Table S2.** Comparison of other reported nanoparticles for the determination of  $\text{Fe}^{3+}$ .

| Method             | Linear range ( $\mu\text{mol/L}$ ) | Detection limit ( $\mu\text{mol/L}$ ) | Ref.      |
|--------------------|------------------------------------|---------------------------------------|-----------|
| S-CDs              | 1~500                              | 0.10                                  | S6        |
| N, P-CDs           | 1~150                              | 0.33                                  | S7        |
| GQDs               | 0~80                               | 7.22                                  | S8        |
| N-CDs              | 2~25                               | 0.90                                  | S9        |
| $\text{MoS}_2$ QDs | 0-50                               | 0.40                                  | S10       |
| Fe, N-CDs          | 0~200                              | 0.64                                  | This work |

**Table S3.** The detailed data on the average lifetime of Fe, N-CDs, Fe, N-CDs with  $\text{Fe}^{3+}$  and Fe, N-CDs with hematin.

| Samples                      | $\tau_1$ (ns) | Value  | $\tau_2$ (ns) | Value   | Average lifetime (ns) |
|------------------------------|---------------|--------|---------------|---------|-----------------------|
| Fe, N-CDs                    | 3.0923        | 94.011 | 14.585        | 255.468 | 13.75                 |
| Fe, N-CDs + $\text{Fe}^{3+}$ | 2.2594        | 93.498 | 13.349        | 355.167 | 12.88                 |
| Fe, N-CDs + Hematin          | 4.2735        | 14.58  | 12.818        | 96.914  | 12.41                 |

## References

1. Y. J. Ju, N. Li, S. G. Liu, J. Y. Liang, X. Gao, Y. Z. Fan, H. Q. Luo and N. B. Li, *Analytical and Bioanalytical Chemistry*, 2019, **411**, 1159-1167.
2. J. Y. Liang, L. Han, S. G. Liu, Y. J. Ju, X. Gao, N. B. Li and H. Q. Luo, *Spectrochimica Acta Part A: Molecular and Biomolecular Spectroscopy*, 2019, **212**, 167-172.
3. F.-Y. Wu, Y.-S. Cheng, D.-M. Wang, M.-L. Li, W.-S. Lu, X.-Y. Xu, X.-H. Zhou and X.-W. Wei, *Materials Science and Engineering: C*, 2020, **112**, 110898.
4. Q. Q. Zhang, B. B. Chen, H. Y. Zou, Y. F. Li and C. Z. Huang, *Biosensors and Bioelectronics*, 2018, **100**, 148-154.
5. W. He, Z. Huo, X. Sun and J. Shen, *Microchemical Journal*, 2020, **153**, 104528
6. Q. Xu, P. Pu, J. Zhao, C. Dong, C. Gao, Y. Chen, J. Chen, Y. Liu and H. Zhou, *Journal of Materials Chemistry A*, 2015, **3**, 542-546.
7. J. Shangguan, J. Huang, D. He, X. He, K. Wang, R. Ye, X. Yang, T. Qing and J. Tang, *Analytical Chemistry*, 2017, **89**, 7477-7484.
8. A. Ananthanarayanan, X. Wang, P. Routh, B. Sana, S. Lim, D.-H. Kim, K.-H. Lim, J. Li and P. Chen, *Advanced Functional Materials*, 2014, **24**, 3021-3026.
9. R. Atchudan, T. N. J. I. Edison, K. R. Aseer, S. Perumal, N. Karthik and Y. R. Lee, *Biosensors and Bioelectronics*, 2018, **99**, 303-311.
10. L. Ruan, Y. Zhao, Z. Chen, W. Zeng, S. Wang, D. Liang and J. Zhao, *Applied Surface Science*, 2020, **528**, 146811
